# Supplementary material for: RNA-Seq versus oligonucleotide array assessment of dose-dependent TCDD-elicited hepatic gene expression in mice
Source: PubMed Central journal article supplement (PMC4456707; doi:10.1186/s12864-015-1527-z), 2015-05-10
Supplement: 12864_2015_1527_MOESM1_ESM.pdf [file 12864_2015_1527_MOESM1_ESM.pdf]

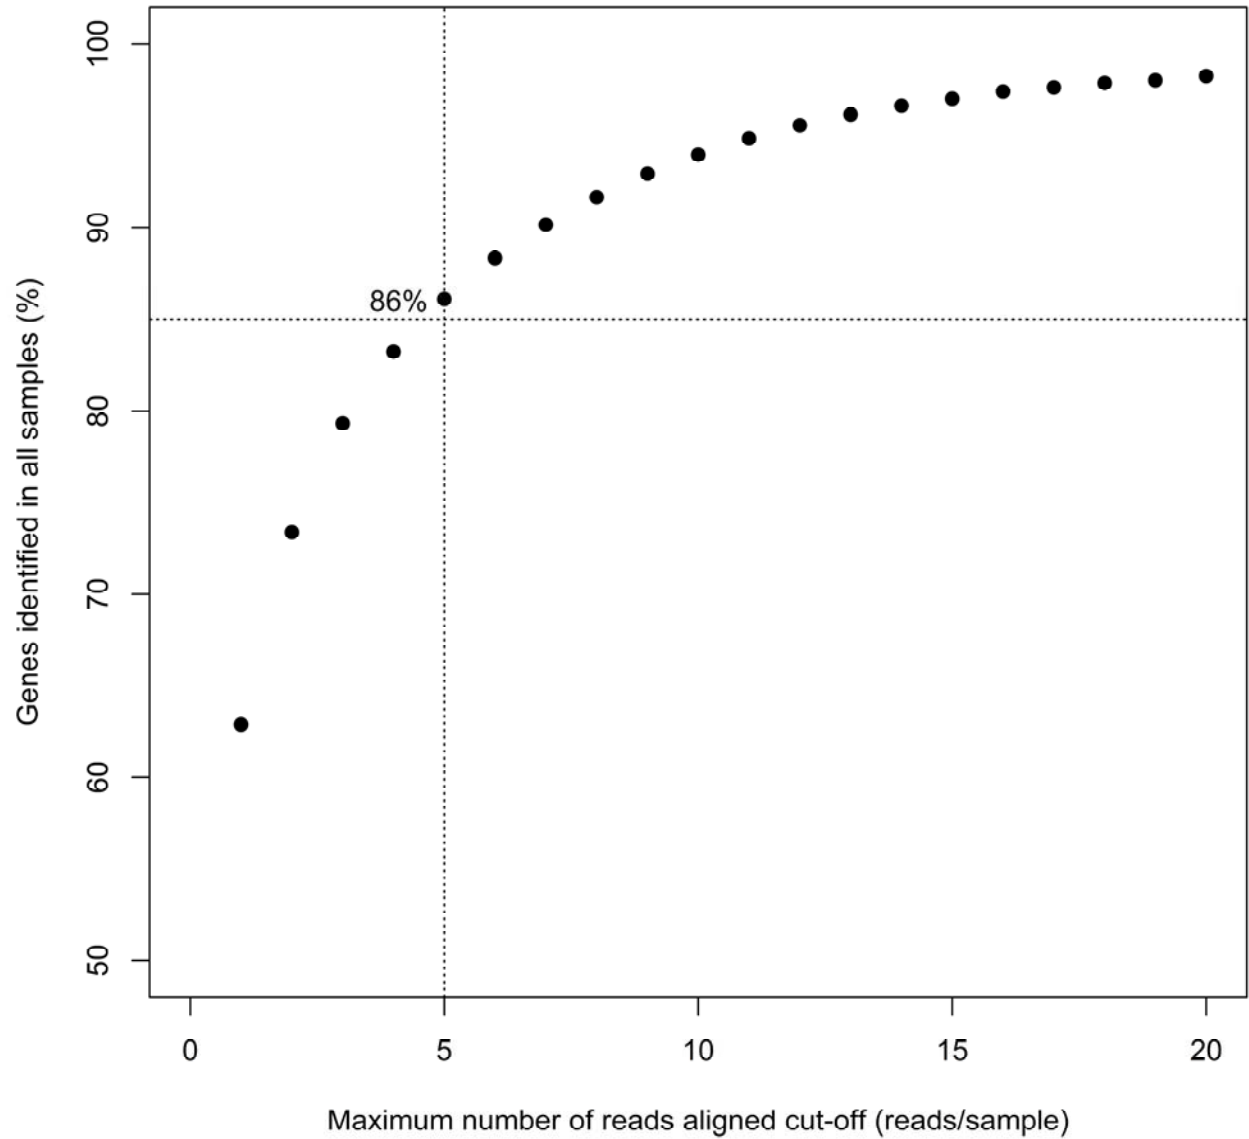

**Supplementary Figure 1** Influence of minimum RNA-Seq aligned read threshold on the inclusion of genes detected in all samples. At a minimum of 5 aligned reads to call a gene “expressed or detected”, 86% of genes included in the analysis were detected in all samples.
