# Supplementary material for: RNA-Seq versus oligonucleotide array assessment of dose-dependent TCDD-elicited hepatic gene expression in mice
Source: PubMed Central journal article supplement (PMC4456707; doi:10.1186/s12864-015-1527-z), 2015-05-10
Supplement: 12864_2015_1527_MOESM10_ESM.pdf [file 12864_2015_1527_MOESM10_ESM.pdf]

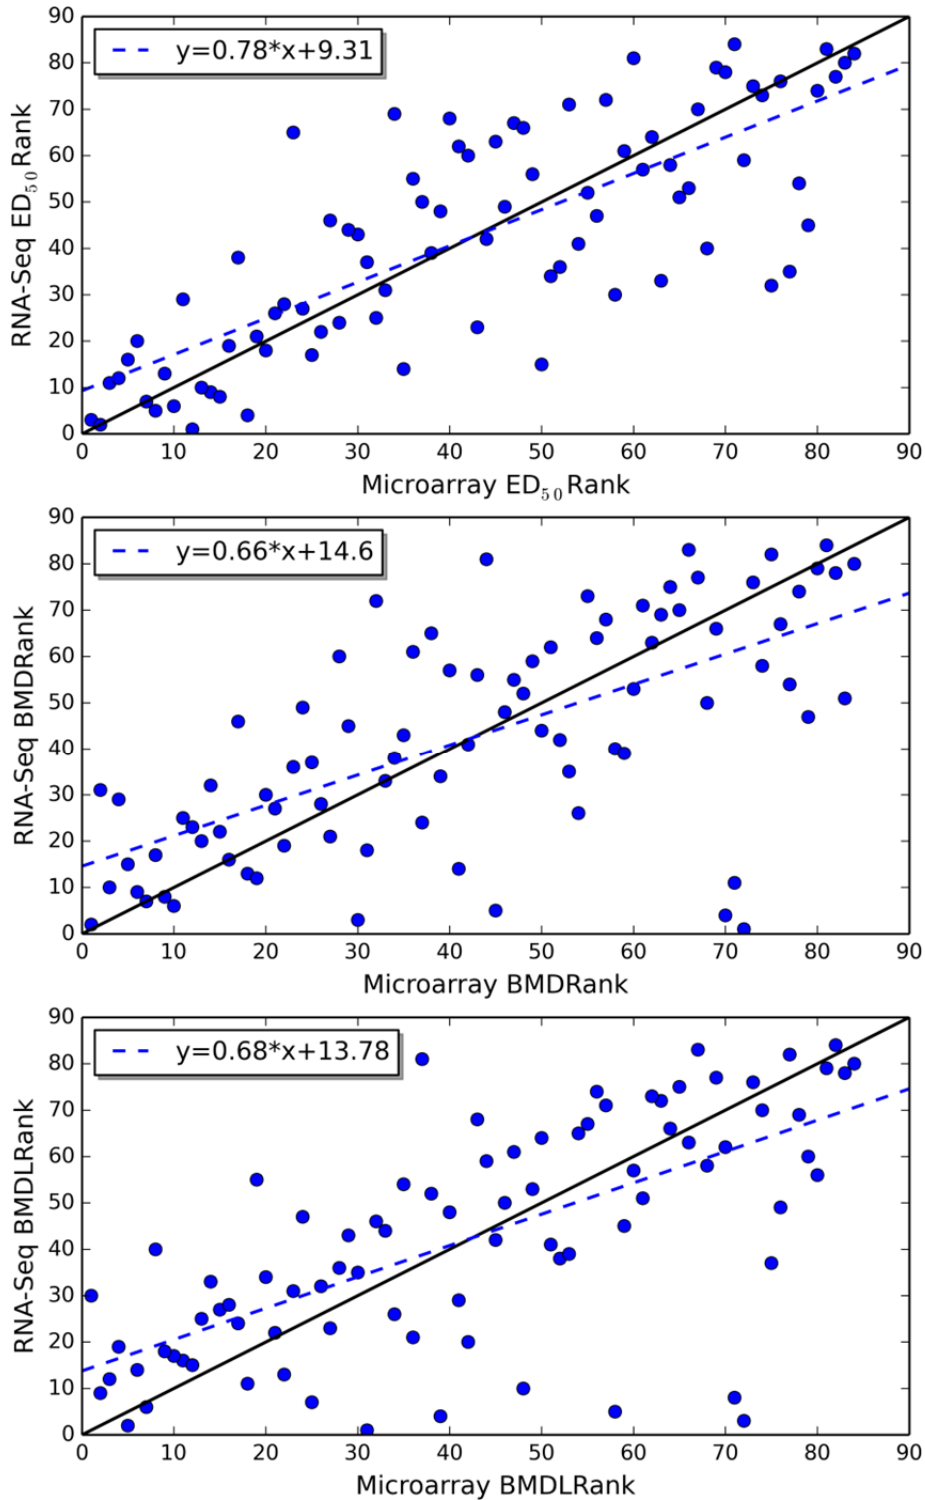

**Supplementary Figure 7** Rank order correlation of dose-response modeling estimates. (a) bench mark dose limit (BMDL), (b) bench mark dose (BMD), and (c) effective dose eliciting a 50% response (ED<sub>50</sub>s) were ranked in both RNA-Seq and Agilent datasets for the 267 genes determined to fit a sigmoidal response by ToxResponse modeler<sup>34</sup> or 142 genes with a best fit curve determined by BMDEpress<sup>35</sup>.
